# Supplementary material for: The Burden of Potentially Inappropriate Medications in Chronic Polypharmacy
Source: PubMed Central journal article supplement (PMC7699788; doi:10.3390/jcm9113728), 2020-11-20
Supplement: jcm-09-03728-s001.pdf [file jcm-09-03728-s001.pdf]

Supplementary material : The Burden of Potentially Inappropriate Medications in Chronic Polypharmacy

Table S1. Description of Beers/Laroche criteria.

| Criteria                                                          | Beers/Laroche number        | ATC Used                                                                                                                                                                                                                                                                                          | Requirement/Exclusion                                             |
|-------------------------------------------------------------------|-----------------------------|---------------------------------------------------------------------------------------------------------------------------------------------------------------------------------------------------------------------------------------------------------------------------------------------------|-------------------------------------------------------------------|
| 1 Antiemetics                                                     | Laroche n°30                | "A03FA05" "A04AD05"                                                                                                                                                                                                                                                                               |                                                                   |
| 2 First-generation antihistamines                                 | Beers n°1 Laroche n°6;7;30  | "R06AD01" "R06AE01" "R06AE51" "R06AB01" "R06AB51" "R06AA08" "R06AB04" "R06AB54" "R06AA04" "R06AA54" "R06AB06" "R06AB56" "R06AB02" "R06AB52" "R06AA09" "R06AA59" "N05BB01" "N05BB51" "R06AE05" "R06AE55" "R06AD07" "R06AD08" "R06AB05" "R06AX23" "R06AD02" "R06AD52" "R06AC01" "R03DA12" "R06AX07" |                                                                   |
| 3 Antiparkinsonian agents                                         | Beers n°2 Laroche n°24      | "N04AC01" "N04AA02" "N04AA12" "N04AA01"                                                                                                                                                                                                                                                           |                                                                   |
| 4 Anticholinergic antispasmodics                                  | Beers n°3 Laroche n°29;8    | "A03BA01" "A03CB03" "A03BA04" "A03CA02" "A03AA07" "A03AA08" "A03CB03" "A03BA03" "A03CB31" "A03BB03" "A03CB01" "G04BD04" "A03AB05" "A03CA34" "A04AD01" "N05CM05" "A04AD51" "A03BB01" "A03DB04" "G04BD08" "G04CA53" "A03AB17" "A03DA07" "G04BD07" "A03CB" "A03DB"                                   |                                                                   |
| 5 Antipsychotic drugs                                             | Laroche n°5                 | "N05AA01" "N05AB02" "N05AC01" "N05AA02" "N05AC04" "N05AA06" "N05AB03"                                                                                                                                                                                                                             |                                                                   |
| 6 Antithrombotics                                                 | Beers n°4;5 Laroche n°16;31 | "B01AC07" "B01AC05"                                                                                                                                                                                                                                                                               | Exclusion of combination Dipyridamole + aspirine extended release |
| 7 Disopyramide                                                    | Beers n°9 Laroche n°15      | C01BA03                                                                                                                                                                                                                                                                                           |                                                                   |
| 8 Short-acting calcium-channel blockers: nifedipine & nicardipine | Beers n°12 Laroche n°12     | "C08CA05" "C08CA04"                                                                                                                                                                                                                                                                               | Exclusion of extended release forms                               |
| 9 Antidepressants (Tricyclic antidepressants (TCAs)/Paroxetine)   | Beers n°14 Laroche n°4      | N06AA09" "N06CA01" "N06AA17" "N06AA04" "N06AA01" "N06AA16" "N06AA12" "N06AA02" "N06AA21" "N06AA10" "N06AB05" "N06AA11" "N06AA06"                                                                                                                                                                  |                                                                   |
| 10 Barbiturates                                                   | Beers n°16                  | "N05CA02" "N05CA01" "N03AA02" "N05CA06"                                                                                                                                                                                                                                                           |                                                                   |
| 11 Benzodiazepines Short and intermediate acting                  | Beers n°17 Laroche n°27     | "N05BA12" "N05BA21" "N05CD04" "N05CD11" "N05BA06" "N05BA56" "N05CD06" "N05BA04" "N05CD07" "N05CD05"                                                                                                                                                                                               |                                                                   |

|                                            |                                                                                  |                                                                                                                                                                                              |                                     |
|--------------------------------------------|----------------------------------------------------------------------------------|----------------------------------------------------------------------------------------------------------------------------------------------------------------------------------------------|-------------------------------------|
| 12 Benzodiazepines<br>Long acting          | Beers n°18 Laroche<br>n°10                                                       | "N05BA08" "N05BA09" "N05BA05" "N05BA02" "N03AE01"<br>"N05BA01" "N05CD03" "N05CD01" "N05BA18" "N05CD02"<br>"N05BA16" "N05BA11" "N05CD10"                                                      |                                     |
| 13 Meprobamate                             | Beers n°19 Laroche<br>n°28                                                       | "N05BC01" "N05BC51" "N05CX01"                                                                                                                                                                |                                     |
| 14 Hypnotics (z-drugs)                     | Beers n°20 Laroche<br>n°27                                                       | "N05CF04" "N05CF02" "N05CF03" "N05CF01"                                                                                                                                                      |                                     |
| 15 Ergoloid mesylates                      | Beers n°21 Laroche<br>n°26                                                       | "C04AE01" "C04AE51" "C04AA01" "C04AE04" "C04AE54"<br>"N04BC03" "C04AX10" "G04BE06" "C04AX21" "C04AE02"<br>"C04AD03" "N06BX03" "N04BC08" "C04AE54" "C05CA54"<br>"C04AX17" "C04AX07" "C05CA51" |                                     |
| 16 Desiccated thyroid                      | Beers n°23                                                                       | "H03AA05"                                                                                                                                                                                    |                                     |
| 17 Megestrol                               | Beers n°27                                                                       | "L02AB01" "G03AC05" "G03DB02" "G03FA08" "G03FB04"<br>"G03AA04" "G03AB01"                                                                                                                     |                                     |
| 18 Sulfonylureas - long acting             | Beers n°28 Laroche<br>n°19                                                       | "A10BB06" "A10BB02" "A10BB12" "A10BD06" "A10BD04"<br>"A10BB01" "A10BB07"                                                                                                                     |                                     |
| 19 Mineral oil, given orally               | Beers n°30                                                                       | "A06AA01" "A06AA51" "A06AD61"                                                                                                                                                                |                                     |
| 20 Cimetidine                              | Laroche n°17                                                                     | "A02BA01" "A02BA51"                                                                                                                                                                          |                                     |
| 21 Stimulant laxatives                     | Laroche n°18                                                                     | "A06AB02" "A06AB52" "A06AA02" "A06AG10" "A06AB05"<br>"A06AB08" "A06AB58" "A06AB07" "A06AB57" "A06AB06"<br>"A06AB56" "A06AB06" "A06AB56"                                                      |                                     |
| 22 Phenylbutazone                          | Laroche n°2                                                                      | "M01AA01" "M02AA01" "M01BA01"                                                                                                                                                                |                                     |
| 23 Meperidine                              | Beers n°32                                                                       | "N02AB02" "N02AG03" "N02AB52" "N02AB72"                                                                                                                                                      |                                     |
| 24 Indomethacin<br>Ketorolac               | Beers n°34 Laroche<br>n°1                                                        | "M01AB01" "C01EB03" "M02AA23" "S01BC01" "S01CC02"<br>"M01AB51" "M01AB15" "S01BC05" "S01FB51"                                                                                                 |                                     |
| 25 Pentozocine (ex-Beers 2015)             | ex Beers n°35<br>(Present in the 2015<br>version, removed in<br>the 2019 update) | "N02AD01"                                                                                                                                                                                    |                                     |
| 26 Skeletal muscle relaxants               | Beers n°36 Laroche<br>n°20                                                       | "M03BA02" "M03BA52" "M03BA72" "M03BB03"<br>"M03BB53" "M03BB73" "M03BX08" "M03BA03" "M03BA53"<br>"M03BA73" "N04AB02" "M03BC01" "M03BC51" "M03BX07"                                            |                                     |
| 27 Central alpha-agonists                  | Beers n°8 Laroche<br>n°11                                                        | "C02AB" "C02LB" "C02AC01" "N02CX02" "S01EA04"<br>"C02LC01" "C02LC51" "C02AC02" "C02AC05" "C02LC05"<br>"C02AC06"                                                                              |                                     |
| 28 Estrogens with or without<br>progestins | Beers n°24                                                                       | "G03CA01" "G03AA15" "G03AB07" "G03AA09" "G03AB05"<br>"G03AA16" "G03AA12" "L02AA03" "G03AA01" "G03AA10"                                                                                       | Exclusion of vaginal administration |

|                                                                                                          |                               |                                                                                                                                                                                                                                                                                                                                                                                                                                                                                                                                                                                                                                                                                                                                                                                           |                                                                                                                            |  |
|----------------------------------------------------------------------------------------------------------|-------------------------------|-------------------------------------------------------------------------------------------------------------------------------------------------------------------------------------------------------------------------------------------------------------------------------------------------------------------------------------------------------------------------------------------------------------------------------------------------------------------------------------------------------------------------------------------------------------------------------------------------------------------------------------------------------------------------------------------------------------------------------------------------------------------------------------------|----------------------------------------------------------------------------------------------------------------------------|--|
|                                                                                                          |                               | "G03AB06" "G03AA07" "G03AB03" "G03AA03" "G03AB02"<br>"G03AA08" "G03AA04" "G03AB01" "G03AA13"<br>"G03AA05" "G03AB04" "G03AA11" "G03AB09" "G03AA06"<br>"G03AA02" "G03CA03" "G03AB08" "G03CA53" "G03AA17"<br>"G03AA14" "G03CA04" "G03CC06" "G03CA06" "G03CA07"<br>"G03CC04" "G03CA09" "G03CA57" "G03CC07" "G03CB01"<br>"G03CC02" "G03CB02" "G03CC05" "L02AA01" "G03CB03"<br>"G03CC03" "G03CB04" "G03CX01" "G03FA01" "G03FB05"<br>"G03FA02" "G03FA03" "G03FA04" "G03FA05" "G03FA06"<br>"G03FA07" "G03FB02" "G03FA08" "G03FB04" "G03FA09"<br>"G03FA10" "G03FB01" "G03FA11" "G03FB09" "G03FA12"<br>"G03FB06" "G03FA13" "G03FA14" "G03FB08" "G03FA15"<br>"G03FA16" "G03FB11" "G03FA17" "G03FB03" "G03FB07"<br>"G03FB10" "G03FB12" "G03EA01" "G03EA02" "G03EA03"<br>"G03HB01" "L02AA02" "L02AA04" |                                                                                                                            |  |
| 29 Reserpine                                                                                             | Laroche n°13 Beers n°8        | "C02AA02" "C02LA01" "C02LA51" "C02LA71" "C02AA52"                                                                                                                                                                                                                                                                                                                                                                                                                                                                                                                                                                                                                                                                                                                                         |                                                                                                                            |  |
| 30 Antipsychotics, first (conventional) and second (atypical) generation <sup>1</sup>                    | Beers n°15                    | "N05A"                                                                                                                                                                                                                                                                                                                                                                                                                                                                                                                                                                                                                                                                                                                                                                                    | Exclusion of Lithium (N05AN)<br>Exclusion of patients with schizophrenia or bipolar disorder (ICD-10 : F20-29; F31; Z51.1) |  |
| 31 Insulin, sliding scale <sup>1</sup>                                                                   | Beers n°26                    | "A10AB"                                                                                                                                                                                                                                                                                                                                                                                                                                                                                                                                                                                                                                                                                                                                                                                   | Exclusion of fast/ intermediate acting insulin when used at the same time than long acting insulin                         |  |
| 32 NonsSteroidal Anti-Inflammatory Drugs (NSAIDs), oral without Pump proton inhibitor (PPI) <sup>1</sup> | Beers n°33                    | "N02BA01" "M01" "H02AA01" "H02AA02" "H02AA03"<br>"H02AB01" "A07EA04" "H02AB02" "A01AC02" "H02AB03"<br>"H02AB04" "H02BX01" "H02AB05" "H02AB06" "A07EA01"<br>"A01AC54" "H02AB07" "A07EA03" "H02AB08" "A01AC01"<br>"H02AB09" "A01AC03" "A07EA02" "H02AB10" "H02AB11"<br>"H02AB12" "H02AB13" "H02AB14" "H02AB15" "H02AB17"<br>"A07EA05" "A07EA06" "A07EA07" "M01BA01" "M01BA02"<br>"M01BA03"                                                                                                                                                                                                                                                                                                                                                                                                  | Exclusion of low dose aspirin. Exclusion of NSAID ued at the same time than PPI                                            |  |
| 33 Pump proton inhibitor (PPI) without chronic use of NSAID or corticosteroids <sup>1</sup>              | Beers n°32                    | "A02BC"                                                                                                                                                                                                                                                                                                                                                                                                                                                                                                                                                                                                                                                                                                                                                                                   | Exclusion of PPI used at the same time than Aspirin (high dose), NSAID, corticoids                                         |  |
| 34 Psychotics in Parkinsons disease                                                                      | Beers list inappropriate with | "N05A"                                                                                                                                                                                                                                                                                                                                                                                                                                                                                                                                                                                                                                                                                                                                                                                    | Parkinson patients identified by hospitalizations and long term cover with ICD 10 code : G20                               |  |

|                                                                                                                                                                                   |                                                                                                     |                                                                                                                         |                                                                                                                                                                                                                  |
|-----------------------------------------------------------------------------------------------------------------------------------------------------------------------------------|-----------------------------------------------------------------------------------------------------|-------------------------------------------------------------------------------------------------------------------------|------------------------------------------------------------------------------------------------------------------------------------------------------------------------------------------------------------------|
|                                                                                                                                                                                   | disease : Parkinson disease                                                                         |                                                                                                                         | Or patients with at least 3 fill/refill of a Parkinson drugs (Identified by "N04BA02" "N04BA03" "N04BC01" "N04BC02" "N04BC04" "N04BC07" "N04BD01" "N04BD02" "N04BX01" "N04BX02")<br>Exclusion of lithium (N05AN) |
| 35 (ex Beers 2015) Drugs inappropriate in chronic seizure                                                                                                                         | Beers list inappropriate with disease : Chronic seizure Present in 2015, removed in the 2019 update | "N06AX12" "A08AA62" "N05AA01" "N05AH02" "N06AA21" "N05AH03" "N05AC02" "N05AF04" "N02AX02" "N02AJ14" "N02AJ15" "N02AJ13" | Chronic seizure/ epilepsy patients identified by hospitalizations and long term cover with ICD 10 code : G40 - 41                                                                                                |
| 36 Antipsychotics and history of fall or fractures <sup>1</sup>                                                                                                                   | Beers list inappropriate with disease : History of fall and fractures                               | "N05A"                                                                                                                  | History of fall and fractures identified by hospitalizations with ICD 10 code : W0 – 1; M84<br>Exclusion of lithium (N05AN)                                                                                      |
| 37 Antidepressants (TCA, Selective serotonin reuptake inhibitors (SSRIs), or Serotonin–norepinephrine reuptake inhibitors (SNRIs)) with history of fall or fractures <sup>1</sup> | Beers list inappropriate with disease : History of fall and fractures                               | "N06AA" "N06AB" "G04BX14" "N06AX21" "N06AX16" "N06AX17" "N06AX23" "N06AX06"                                             | History of fall and fractures identified by hospitalizations with ICD 10 code : W0 – 1; M                                                                                                                        |
| 38 Opioids and history of fall or fractures <sup>1</sup>                                                                                                                          | Beers list inappropriate with disease : History of fall and fractures                               | "N02A"                                                                                                                  | History of fall and fractures identified by hospitalizations with ICD 10 code : W0 – 1; M                                                                                                                        |

<sup>1</sup>Partially applicable criterion. PPIs: proton pump inhibitors; NSAIDs: nonsteroidal anti-inflammatory drugs, TCAs: Tricyclic antidepressants, SSRIs: Selective serotonin reuptake inhibitors, SNRIs: Serotonin–norepinephrine reuptake inhibitors.

**Table S2.** Description of PROMPT inappropriate criteria.

| Criteria                                                        | PROMPT number | ATC Used                                                                                                                                                                                                                                                                                                                                                                    | Requirement/Exclusion                                                                                                                                                                                                                                                                                                             |
|-----------------------------------------------------------------|---------------|-----------------------------------------------------------------------------------------------------------------------------------------------------------------------------------------------------------------------------------------------------------------------------------------------------------------------------------------------------------------------------|-----------------------------------------------------------------------------------------------------------------------------------------------------------------------------------------------------------------------------------------------------------------------------------------------------------------------------------|
| PR0 stimulant laxatives (except if concurrent use of opioids)   | PROMPT n°1    | "A06AB02" "A06AB52" "A06AA02" "A06AG10"<br>"A06AB05" "A06AB08" "A06AB58" "A06AB07"<br>"A06AB57" "A06AB06" "A06AB56" "A06AB06"<br>"A06AB56"                                                                                                                                                                                                                                  | Exclusion of patients who have not received a non stimulant laxative the year before (means first line treatment; ATC: "A06AB02" "A06AB52" "A06AA02" "A06AG10" "A06AB05" "A06AB08" "A06AB58" "A06AB07" "A06AB57" "A06AB06" "A06AB56" "A06AB06" "A06AB56")<br>Exclusion of patient who used an opioid at the same time (ATC: N02A) |
| PR1 Association of esomeprazole/omeprazole and clopidogrel      | PROMPT n°3    | "B01AC04" "A02BC01" "A02BC05"                                                                                                                                                                                                                                                                                                                                               | Both inappropriate only if used at the same time (day)                                                                                                                                                                                                                                                                            |
| PR2 Cardio-selective calcium-channel blockers and beta blockers | PROMPT n°6    | "C08DB01" "C05AE03" "C08DA01" "C07A"                                                                                                                                                                                                                                                                                                                                        | Both inappropriate only if used at the same time (day)                                                                                                                                                                                                                                                                            |
| PR3 Dipyridamol – short acting                                  | PROMPT n°7    | B01AC07                                                                                                                                                                                                                                                                                                                                                                     | Exclusion of combination Dipyridamole + aspirine extended release                                                                                                                                                                                                                                                                 |
| PR4 First generation antihistamines                             | PROMPT n°8    | "R06AD01" "R06AE01" "R06AE51" "R06AB01"<br>"R06AB51" "R06AA08" "R06AB04" "R06AB54"<br>"R06AA04" "R06AA54" "R06AB06" "R06AB56"<br>"R06AB02" "R06AB52" "R06AA09" "R06AA59"<br>"N05BB01" "N05BB51" "R06AE05" "R06AE55"<br>"R06AD07" "R06AD08" "R06AB05" "R06AX23"<br>"R06AD02" "R06AD52" "R06AC01" "R03DA12"<br>"R06AX07"                                                      |                                                                                                                                                                                                                                                                                                                                   |
| PR5 Theophylline in monotherapy                                 | PROMPT n°9    | "R03DA04" "R03DB04" "R03DA54" "R03DA74"                                                                                                                                                                                                                                                                                                                                     | Exclusion of patients using a inhaled corticoid at the same time (ATC: "R03BA")                                                                                                                                                                                                                                                   |
| PR6 Oral corticoid (without use of bisphosphonate)              | PROMPT n°10   | "H02AA01" "H02AA02" "H02AA03" "H02AB01"<br>"A07EA04" "H02AB02" "A01AC02" "H02AB03"<br>"H02AB04" "H02BX01" "H02AB05" "H02AB06"<br>"A07EA01" "A01AC54" "H02AB07" "A07EA03"<br>"H02AB08" "A01AC01" "H02AB09" "A01AC03"<br>"A07EA02" "H02AB10" "H02AB11" "H02AB12"<br>"H02AB13" "H02AB14" "H02AB15" "H02AB17"<br>"A07EA05" "A07EA06" "A07EA07" "M01BA01"<br>"M01BA02" "M01BA03" | Exclusion of patient using a bisphosphonate at the same time (ATC: "M05BA")                                                                                                                                                                                                                                                       |

|                                                                                                                      |                |                                                                                                                                            |                                                                                                                                                                      |
|----------------------------------------------------------------------------------------------------------------------|----------------|--------------------------------------------------------------------------------------------------------------------------------------------|----------------------------------------------------------------------------------------------------------------------------------------------------------------------|
| PR7 Association of Selective serotonin reuptake inhibitors (SSRIs) and Venlafaxine <sup>1</sup>                      | PROMPT<br>n°12 | "N06AB" "N06AX16"                                                                                                                          | Both inappropriate only if used at the same time (day)                                                                                                               |
| PR8 Tricyclic antidepressants (TCA) in first line treatment                                                          | PROMPT<br>n°13 | "N06AA"                                                                                                                                    | Exclusion of patients who have received another antidepressant before (in the same year or the year before, it means first line treatment; ATC: "N06A" except N06AA) |
| PR91 Benzodiazepines – Short and intermediate acting                                                                 | PROMPT<br>n°14 | "N05BA12" "N05BA21" "N05CD04" "N05CD11"<br>"N05BA06" "N05BA56" "N05CD06" "N05BA04"<br>"N05CD07" "N05CD05"                                  |                                                                                                                                                                      |
| PR92 Benzodiazepines – long acting                                                                                   | PROMPT<br>n°14 | "N05BA08" "N05BA09" "N05BA05" "N05BA02"<br>"N03AE01" "N05BA01" "N05CD03" "N05CD01"<br>"N05BA18" "N05CD02" "N05BA16" "N05BA11"<br>"N05CD10" |                                                                                                                                                                      |
| PR10 Hypnotics                                                                                                       | PROMPT<br>n°15 | "N05CF04" "N05CF02" "N05CF03" "N05CF01"                                                                                                    |                                                                                                                                                                      |
| PR11 Carbamazepine used with Erythromycin/Clarithromycin                                                             | PROMPT<br>n°16 | "N03AF01"                                                                                                                                  | Exclusion of day when patients received/used Erythromycin/Clarithromycin even if this latter was not chronic (cumulative use of at least 6 months)                   |
| PR12 Opioid (use without laxative)                                                                                   | PROMPT<br>n°17 | "N02A"                                                                                                                                     | Exclusion of patient using a laxative at the same time (ATC: "A06")                                                                                                  |
| PR13 Nitrofurantoin chronic                                                                                          | PROMPT<br>n°18 | "J01XE01" "J01XE51"                                                                                                                        |                                                                                                                                                                      |
| PR14 Sulfonylureas - long acting                                                                                     | PROMPT<br>n°19 | "A10BB"                                                                                                                                    |                                                                                                                                                                      |
| PR15 Chronic Non-steroidal anti-inflammatory drugs (NSAIDs)                                                          | PROMPT<br>n°20 | "M01A"                                                                                                                                     |                                                                                                                                                                      |
| PR16 Association of two drugs among NSAIDs, Low dose aspirin or SSRI, without use of a Proton pump inhibitors (PPIs) | PROMPT<br>n°22 | "B01AC06" "N06AB" "G04BX14"                                                                                                                | Exclusion of patient using a laxative at the same time (ATC: "A02BC")                                                                                                |

PPIs: proton pump inhibitors; NSAIDs: nonsteroidal anti-inflammatory drugs, TCAs: Tricyclic antidepressants, SSRIs: Selective serotonin reuptake inhibitors.

**Table S3.** Overlaps in combined Beers/Laroche list and PROMPT list.

|                                                                                                                                 | Beers/ Laroche criteria from table S1                       | PROMPT criteria from table S2            |
|---------------------------------------------------------------------------------------------------------------------------------|-------------------------------------------------------------|------------------------------------------|
| First-generation antihistamines                                                                                                 | 2                                                           | PR4                                      |
| Short-acting calcium-channel blockers: nifedipine & nicardipine                                                                 | 8                                                           | PR2                                      |
| Tricyclic antidepressants (TCAs)                                                                                                | 9                                                           | PR8                                      |
| Benzodiazepines                                                                                                                 | 11                                                          | PR91                                     |
| Short and intermediate acting Benzodiazepines                                                                                   | 12                                                          | PR92                                     |
| Long acting Hypnotics (z-drugs)                                                                                                 | 14                                                          | PR10                                     |
| Sulfonylureas - long acting                                                                                                     | 18                                                          | PR14                                     |
| Stimulant laxatives                                                                                                             | 21                                                          | PR0                                      |
| Non-cyclooxygenase-selective NSAIDs, oral                                                                                       | 32 without Pump proton inhibitor (PPI)                      | PR15                                     |
| Pump proton inhibitor (PPI) without chronic use of nonsteroidal anti-inflammatory drugs (NSAIDs) or corticosteroids             | 33 all PPIs without chronic use of NSAID or corticosteroids | PR1 (interaction Omeprazole clopidogrel) |
| Antidepressants (TCA, Selective serotonin reuptake inhibitors (SSRIs), or Serotonin-norepinephrine reuptake inhibitors (SNRIs)) | 37 with history of fall or fractures                        | PR7 Association of SSRI and Venlafaxine1 |
| Opioids                                                                                                                         | 38 with history of fall or fractures                        | PR12 use without laxative                |

PPIs: proton pump inhibitors; NSAIDs: nonsteroidal anti-inflammatory drugs, TCAs: Tricyclic antidepressants, SSRIs: Selective serotonin reuptake inhibitors, SNRIs: Serotonin-norepinephrine reuptake inhibitors.

**Table S4.** Prevalences of long term diseases according to chronic polypharmacy in 2016 in older adults.

| Long-term diseases <sup>1</sup> per age class                                         | Cohort         | Chronic Polypharmacy | Chronic Hyperpolypharmacy |
|---------------------------------------------------------------------------------------|----------------|----------------------|---------------------------|
| <b>Older adults (n)</b>                                                               | <b>117,545</b> | <b>27,834</b>        | <b>2868</b>               |
| 1 - Stroke, n (%)                                                                     | 3639 (3.10)    | 1534 (5.51)          | 164 (5.72)                |
| 2 - Bone marrow failure and chronic cytopenia, n (%)                                  | 196 (0.17)     | 63 (0.23)            | 12 (0.42)                 |
| pl3 - Ischemic artery disease, n (%)                                                  | 4727 (4.02)    | 2323 (8.35)          | 305 (10.63)               |
| 4 - Schistosomiasis, n (%)                                                            | 0 (0.00)       | 0 (0.00)             | 0 (0.00)                  |
| 5 - Heart failure, arrhythmia or valvular heart disease, n (%)                        | 10,529 (8.96)  | 4610 (16.56)         | 502 (17.50)               |
| 6 - Chronic liver disease and cirrhosis, n (%)                                        | 738 (0.63)     | 211 (0.76)           | 33 (1.15)                 |
| 7 - Primary immunodeficiency or HIV positive, n (%)                                   | 151 (0.13)     | 65 (0.23)            | 13 (0.45)                 |
| 8 - Diabetes (type 1 or type 2), n (%)                                                | 17,020 (14.48) | 8553 (30.73)         | 1408 (49.09)              |
| 9 - Major neuromuscular disease (including myopathy) and severe epilepsy, n (%)       | 959 (0.82)     | 333 (1.20)           | 47 (1.64)                 |
| 10 - Haemoglobinopathy - Haemolysis - chronic hereditary or acquired and major, n (%) | 24 (0.02)      | 6 (0.02)             | 1 (0.03)                  |
| 11 - Haemophilia, n (%)                                                               | 123 (0.10)     | 34 (0.12)            | 10 (0.35)                 |
| 12 - Major high blood pressure, n (%)                                                 | 6,677 (5.68)   | 3554 (12.77)         | 556 (19.39)               |
| 13 - Coronary artery disease, n (%)                                                   | 9,682 (8.24)   | 5241 (18.83)         | 682 (23.78)               |

| Long-term diseases <sup>1</sup> per age class                                | Cohort         | Chronic Polypharmacy | Chronic Hyperpolypharmacy |
|------------------------------------------------------------------------------|----------------|----------------------|---------------------------|
| 14 – Major chronic respiratory failure, n (%)                                | 2658 (2.26)    | 1183 (4.25)          | 267 (9.31)                |
| 15 - Alzheimer or other dementia, n (%)                                      | 4,230 (3.60)   | 1242 (4.46)          | 112 (3.91)                |
| 16 – Parkinson diseases, n (%)                                               | 1305 (1.11)    | 497 (1.79)           | 69 (2.41)                 |
| 17 - Inborn errors of metabolism, n (%)                                      | 261 (0.22)     | 69 (0.25)            | 2 (0.07)                  |
| 18 - Cystic fibrosis, n (%)                                                  | 1 (0.00)       | 0 (0.00)             | 0 (0.00)                  |
| 19 – Major chronic nephropathy and primary nephrotic syndrome, n (%)         | 1262 (1.07)    | 612 (2.20)           | 95 (3.31)                 |
| 20 - Paraplegia, n (%)                                                       | 105 (0.09)     | 29 (0.10)            | 3 (0.10)                  |
| 21 - Vasculitis - Systemic lupus erythematosus - Systemic scleroderma, n (%) | 539 (0.46)     | 205 (0.74)           | 22 (0.77)                 |
| 22 - Rheumatoid arthritis, n (%)                                             | 1333 (1.13)    | 476 (1.71)           | 66 (2.30)                 |
| 23 - Long term psychiatric disease, n (%)                                    | 3807 (3.24)    | 1513 (5.44)          | 283 (9.87)                |
| 24 – Crohn disease and ulcerative colitis, n (%)                             | 293 (0.25)     | 79 (0.28)            | 13 (0.45)                 |
| 25 - Multiple sclerosis, n (%)                                               | 165 (0.14)     | 54 (0.19)            | 6 (0.21)                  |
| 26 – Scoliosis, idiopathic and evolving, n (%)                               | 58 (0.05)      | 16 (0.06)            | 0 (0.00)                  |
| 27 – Major Spondyloarthropathy, n (%)                                        | 266 (0.23)     | 81 (0.29)            | 11 (0.38)                 |
| 28 – Organ transplantation follow-up, n (%)                                  | 56 (0.05)      | 27 (0.10)            | 4 (0.14)                  |
| 29 – Active tuberculosis or Leprosy, n (%)                                   | 56 (0.05)      | 12 (0.04)            | 1 (0.03)                  |
| 30 - Cancer or leukemia, n (%)                                               | 15,077 (12.83) | 4079 (14.65)         | 431 (15.03)               |

<sup>1</sup>list of 30 specifically individualized chronic diseases defined by the French Health Care Insurance System.

**Table 5.** Prevalences of long term diseases according to polypharmacy in 2016 in middle-aged adults.

| Long-term diseases <sup>1</sup> per age class                                         | Cohort         | Chronic Polypharmacy | Chronic Hyperpolypharmacy |
|---------------------------------------------------------------------------------------|----------------|----------------------|---------------------------|
| <b>Middle-aged adults (n)</b>                                                         | <b>159,243</b> | <b>8666</b>          | <b>760</b>                |
| 1 - Stroke, n (%)                                                                     | 1315 (0.83)    | 374 (2.71)           | 43 (5.66)                 |
| 2 - Bone marrow failure and chronic cytopenia, n (%)                                  | 39 (0.02)      | 3 (0.03)             | 0 (0.00)                  |
| 3 - Ischemic artery disease, n (%)                                                    | 1599 (1.00)    | 478 (5.52)           | 57 (7.50)                 |
| 4 - Schistosomiasis, n (%)                                                            | 0 (0.00)       | 0 (0.00)             | 0 (0.00)                  |
| 5 – Heart failure, arrhythmia or valvular heart disease, n (%)                        | 1908 (1.20)    | 568 (6.55)           | 74 (9.74)                 |
| 6 – Chronic liver disease and cirrhosis, n (%)                                        | 1109 (0.70)    | 159 (1.83)           | 16 (2.11)                 |
| 7 - Primary immunodeficiency or HIV positive, n (%)                                   | 662 (0.42)     | 157 (1.81)           | 15 (1.97)                 |
| 8 - Diabetes (type 1 or type 2), n (%)                                                | 9602 (6.03)    | 2980 (34.39)         | 417 (54.87)               |
| 9 – Major neuromuscular disease (including myopathy) and severe epilepsy, n (%)       | 1000 (0.63)    | 197 (2.27)           | 17 (2.24)                 |
| 10 - Haemoglobinopathy – Haemolysis – chronic hereditary or acquired and major, n (%) | 31 (0.02)      | 4 (0.05)             | 0 (0.00)                  |
| 11 - Haemophilia, n (%)                                                               | 110 (0.07)     | 19 (0.22)            | 1 (0.13)                  |



| Long-term diseases <sup>1</sup> per age class                                | Cohort       | Chronic Polypharmacy | Chronic Hyperpolypharmacy |
|------------------------------------------------------------------------------|--------------|----------------------|---------------------------|
| 12 - Major high blood pressure, n (%)                                        | 1446 (0.91)  | 595 (6.87)           | 82 (10.79)                |
| 13 - Coronary artery disease, n (%)                                          | 3566 (2.24)  | 1545 (17.83)         | 167 (21.97)               |
| 14 - Major chronic respiratory failure, n (%)                                | 1,221 (0.77) | 350 (4.04)           | 75 (9.87)                 |
| 15 - Alzheimer or other dementia, n (%)                                      | 90 (0.06)    | 15 (0.17)            | 2 (0.26)                  |
| 16 - Parkinson diseases, n (%)                                               | 156 (0.10)   | 39 (0.45)            | 5 (0.66)                  |
| 17 - Inborn errors of metabolism, n (%)                                      | 260 (0.16)   | 28 (0.32)            | 4 (0.53)                  |
| 18 - Cystic fibrosis, n (%)                                                  | 1 (0.00)     | 0 (0.00)             | 0 (0.00)                  |
| 19 - Major chronic nephropathy and primary nephrotic syndrome, n (%)         | 477 (0.30)   | 169 (1.95)           | 22 (2.89)                 |
| 20 - Paraplegia, n (%)                                                       | 138 (0.09)   | 20 (0.23)            | 2 (0.26)                  |
| 21 - Vasculitis - Systemic lupus erythematosus - Systemic scleroderma, n (%) | 364 (0.23)   | 66 (0.76)            | 12 (1.58)                 |
| 22 - Rheumatoid arthritis, n (%)                                             | 997 (0.63)   | 145 (1.67)           | 20 (2.63)                 |
| 23 - Long term psychiatric disease, n (%)                                    | 6301 (3.96)  | 1385 (15.98)         | 186 (24.47)               |
| 24 - Crohn disease and ulcerative colitis, n (%)                             | 656 (0.41)   | 42 (0.48)            | 3 (0.39)                  |
| 25 - Multiple sclerosis, n (%)                                               | 438 (0.28)   | 60 (0.69)            | 9 (1.18)                  |
| 26 - Scoliosis, idiopathic and evolving, n (%)                               | 54 (0.03)    | 9 (0.10)             | 0 (0.00)                  |
| 27 - Major Spondyloarthropathy, n (%)                                        | 604 (0.38)   | 62 (0.72)            | 8 (1.05)                  |
| 28 - Organ transplantation follow-up, n (%)                                  | 67 (0.04)    | 31 (0.36)            | 4 (0.53)                  |
| 29 - Active tuberculosis or Leprosy, n (%)                                   | 53 (0.03)    | 3 (0.03)             | 0 (0.00)                  |
| 30 - Cancer or leukemia, n (%)                                               | 6914 (4.34)  | 688 (7.94)           | 61 (8.03)                 |

<sup>1</sup>list of 30 specifically individualized chronic diseases defined by the French Health Care Insurance System.

**Table 6.** Prevalence and exposure to potentially inappropriate medications in older adults with chronic polypharmacy according to Beers criteria, Laroche list.

|                                                           | Older adults with chronic polypharmacy | Older adults with chronic hyperpolypharmacy | Exposure to chronic polypharmacy in older adults (%) |
|-----------------------------------------------------------|----------------------------------------|---------------------------------------------|------------------------------------------------------|
|                                                           | n = 27,834                             | n = 2868                                    | 100                                                  |
| Potentially inappropriate medication - broad <sup>1</sup> | 18,036 (64.8)                          | 2544 (88.7)                                 | 13.5                                                 |
| Potentially inappropriate medication-narrow <sup>2</sup>  | 10,220 (36.7)                          | 1730 (60.3)                                 | 6.7                                                  |
| Beers/Laroche criteria                                    |                                        |                                             |                                                      |
| 1 Antiemetics                                             | 0 (0.0)                                | 0 (0.0)                                     | 0.0                                                  |
| 2 First-generation antihistamines                         | 659 (2.4)                              | 159 (5.5)                                   | 0.3                                                  |
| 3 Antiparkinsonian agents                                 | 133 (0.5)                              | 21 (0.7)                                    | 0.1                                                  |
| 4 Anticholinergic antispasmodics                          | 626 (2.3)                              | 119 (4.2)                                   | 0.3                                                  |
| 5 Antipsychotic drugs                                     | 223 (0.8)                              | 47 (1.6)                                    | 0.1                                                  |
| 6 Antithrombotics                                         | 23 (0.1)                               | 4 (0.1)                                     | <0.1                                                 |

|                                                                                                                                                                                               | Older adults<br>with chronic<br>polypharmacy | Older adults with<br>chronic<br>hyperpolypharmacy | Exposure to<br>chronic<br>polypharmacy in<br>older adults (%) |
|-----------------------------------------------------------------------------------------------------------------------------------------------------------------------------------------------|----------------------------------------------|---------------------------------------------------|---------------------------------------------------------------|
|                                                                                                                                                                                               | n = 27,834                                   | n = 2868                                          | 100                                                           |
| 7 Disopyramide                                                                                                                                                                                | 23 (0.1)                                     | 0 (0.0)                                           | < 0.1                                                         |
| 8 Short-acting calcium-channel<br>blockers: nifedipine & nocardipine                                                                                                                          | 19 (0.1)                                     | 5 (0.2)                                           | 0.0                                                           |
| 9 Antidepressants (Tricyclic<br>antidepressants (TCAs)/Paroxetine)                                                                                                                            | 1324 (4.8)                                   | 228 (8.0)                                         | 0.7                                                           |
| 10 Barbiturates                                                                                                                                                                               | 87 (0.3)                                     | 10 (0.4)                                          | 0.1                                                           |
| 11 Benzodiazepines<br>Short and intermediate acting                                                                                                                                           | 3807 (13.7)                                  | 660 (23.0)                                        | 2.0                                                           |
| 12 Benzodiazepines<br>Long acting                                                                                                                                                             | 1271 (4.6)                                   | 286 (10.0)                                        | 0.6                                                           |
| 13 Meprobamate                                                                                                                                                                                | 0 (0.0)                                      | 0 (0.0)                                           | 0.0                                                           |
| 14 Hypnotics (z-drugs)                                                                                                                                                                        | 1688 (6.1)                                   | 382 (13.3)                                        | 0.8                                                           |
| 15 Ergoloid mesylates                                                                                                                                                                         | 380 (1.4)                                    | 71 (2.5)                                          | 0.2                                                           |
| 16 Desiccated thyroid                                                                                                                                                                         | 0 (0.0)                                      | 0 (0.0)                                           | 0.0                                                           |
| 17 Megestrol                                                                                                                                                                                  | 0 (0.0)                                      | 0 (0.0)                                           | 0.0                                                           |
| 18 Sulfonylureas - long acting                                                                                                                                                                | 1071 (3.9)                                   | 201 (7.0)                                         | 0.6                                                           |
| 19 Mineral oil, given orally                                                                                                                                                                  | 205 (0.7)                                    | 39 (1.4)                                          | 0.1                                                           |
| 20 Cimetidine                                                                                                                                                                                 | 3 (0.0)                                      | 0 (0.0)                                           | 0.0                                                           |
| 21 Stimulant laxatives                                                                                                                                                                        | 1 (0.0)                                      | 0 (0.0)                                           | 0.0                                                           |
| 22 Phenylbutazone                                                                                                                                                                             | 0 (0.0)                                      | 0 (0.0)                                           | 0.0                                                           |
| 23 Meperidine                                                                                                                                                                                 | 0 (0.0)                                      | 0 (0.0)                                           | 0.0                                                           |
| 24 Indomethacin<br>Ketorolac                                                                                                                                                                  | 24 (0.1)                                     | 6 (0.2)                                           | < 0.1                                                         |
| 25 Pentozocine (ex-Beers 2015)                                                                                                                                                                | 0 (0.0)                                      | 0 (0.0)                                           | 0.0                                                           |
| 26 Skeletal muscle relaxants                                                                                                                                                                  | 0 (0.0)                                      | 0 (0.0)                                           | 0.0                                                           |
| 27 Central alpha-agonists                                                                                                                                                                     | 1404 (5.0)                                   | 308 (10.7)                                        | 0.8                                                           |
| 28 Estrogens with or without<br>progestins                                                                                                                                                    | 181 (0.7)                                    | 35 (1.2)                                          | 0.1                                                           |
| 29 Reserpine                                                                                                                                                                                  | 0 (0.0)                                      | 0 (0.0)                                           | 0.0                                                           |
| 30 Antipsychotics, first<br>(conventional) and<br>second (atypical) generation <sup>3</sup>                                                                                                   | 227 (0.8)                                    | 43 (1.5)                                          | 0.1                                                           |
| 31 Insulin, sliding scale <sup>1</sup>                                                                                                                                                        | 108 (0.4)                                    | 40 (1.4)                                          | < 0.1                                                         |
| 32 NonsSteroidal Anti-Inflammatory<br>Drugs (NSAIDs), oral without Pump<br>proton inhibitor (PPI) <sup>3</sup>                                                                                | 418 (1.5)                                    | 65 (2.3)                                          | 0.2                                                           |
| 33 Pump proton inhibitor (PPI)<br>without chronic use of NSAID or<br>corticosteroids <sup>3</sup>                                                                                             | 12,073 (43.4)                                | 1924 (67.1)                                       | 6.3                                                           |
| 34 Psychotics in Parkinsons disease                                                                                                                                                           | 66 (0.2)                                     | 10 (0.4)                                          | < 0.1                                                         |
| 35 (ex Beers 2015) Drugs<br>innappropriate in chronic seizure                                                                                                                                 | 34 (0.1)                                     | 7 (0.2)                                           | < 0.1                                                         |
| 36 Antipsychotics and history of fall<br>or fractures <sup>3</sup>                                                                                                                            | 86 (0.3)                                     | 14 (0.5)                                          | < 0.1                                                         |
| 37 Antidepressants (TCA, Selective<br>serotonin reuptake inhibitors (SSRIs),<br>or Serotonin–norepinephrine<br>reuptake inhibitors (SNRIs)) with<br>history of fall or fractures <sup>3</sup> | 420 (1.5)                                    | 73 (2.6)                                          | 0.2                                                           |
| 38 Opioids and history of fall or<br>fractures <sup>3</sup>                                                                                                                                   | 134 (0.5)                                    | 35 (1.2)                                          | 0.1                                                           |

<sup>1</sup>considering both fully and partially applicable criteria <sup>2</sup>considering only fully applicable criteria <sup>3</sup>partially applicable criteria, <sup>1,2,3</sup>more details are provided in table S1. PPIs: proton pump inhibitors; NSAIDs: nonsteroidal anti-inflammatory drugs, TCAs: Tricyclic antidepressants, SSRIs: Selective serotonin reuptake inhibitors, SNRIs: Serotonin–norepinephrine reuptake inhibitors.

**Table 7.** Prevalence and exposure to potentially inappropriate medications and interactions in middle-aged adults with chronic polypharmacy according to PROMPT criteria.

|                                                                                                                                   | Middle-aged adults with chronic polypharmacy | Middle-aged adults with chronic hyperpolypharmacy | Exposure to chronic polypharmacy in middle-aged adults (%) |
|-----------------------------------------------------------------------------------------------------------------------------------|----------------------------------------------|---------------------------------------------------|------------------------------------------------------------|
|                                                                                                                                   | n = 8,666                                    | n = 760                                           | 100                                                        |
| Potentially inappropriate medication                                                                                              | 4009 (46.2)                                  | 570 (75.0)                                        | 10.4                                                       |
| PR0 stimulant laxatives (except if concurrent use of opioids)                                                                     | 0 (0.0)                                      | 0 (0.0)                                           | 0.0                                                        |
| PR1 Association of esomeprazole/omeprazole and clopidogrel                                                                        | 251 (2.9)                                    | 59 (7.8)                                          | 0.8                                                        |
| PR2 Cardio-selective calcium-channel blockers and beta blockers                                                                   | 28 (0.3)                                     | 4 (0.5)                                           | 0.1                                                        |
| PR3 Dipyridamol – short acting                                                                                                    | 2 (0.0)                                      | 0 (0.0)                                           | 0.0                                                        |
| PR4 First generation antihistamines                                                                                               | 450 (5.2)                                    | 90 (11.8)                                         | 0.7                                                        |
| PR5 Theophylline in monotherapy                                                                                                   | 15 (0.2)                                     | 4 (0.5)                                           | < 0.1                                                      |
| PR6 Oral corticoid (without use of bisphosphonate)                                                                                | 176 (2.0)                                    | 38 (5.0)                                          | 0.3                                                        |
| PR7 Association of Selective serotonin reuptake inhibitors (SSRIs)and Venlafaxine <sup>1</sup>                                    | 15 (0.2)                                     | 1 (0.1)                                           | < 0.1                                                      |
| PR8 Tricyclic antidepressants (TCA) in first line treatment                                                                       | 107 (1.2)                                    | 16 (2.1)                                          | 0.2                                                        |
| PR91 Benzodiazepines – Short and intermediate acting                                                                              | 1395 (16.1)                                  | 232 (30.5)                                        | 2.7                                                        |
| PR92 Benzodiazepines – long acting                                                                                                | 879 (10.1)                                   | 138 (18.2)                                        | 1.5                                                        |
| PR10 Hypnotics                                                                                                                    | 637 (7.4)                                    | 115 (15.1)                                        | 1.0                                                        |
| PR11 Carbamazepine used with Erythromycin/Clarithromycin                                                                          | 2 (0.0)                                      | 1 (0.0)                                           | 0.0                                                        |
| PR12 Opioid (use without laxative)                                                                                                | 639 (7.4)                                    | 143 (18.8)                                        | 1.1                                                        |
| PR13 Nitrofurantoin chronic                                                                                                       | 0 (0.0)                                      | 0 (0.0)                                           | 0.0                                                        |
| PR14 Sulfonylureas - long acting                                                                                                  | 1069 (12.3)                                  | 178 (23.4)                                        | 1.9                                                        |
| PR15 Chronic Non-steroidal anti-inflammatory drugs (NSAIDs)                                                                       | 80 (0.9)                                     | 14 (1.8)                                          | 0.1                                                        |
| PR16 Association of two drugs among NSAIDs, Low dose aspirin or SSRI, without use of a Proton pump inhibitors (PPIs) <sup>1</sup> | 9 (0.1)                                      | 0 (0.0)                                           | < 0.1                                                      |

<sup>1</sup>This criteria considered both drugs in the association as potentially inappropriate, PPIs: proton pump inhibitors; NSAIDs: nonsteroidal anti-inflammatory drugs, TCAs: Tricyclic antidepressants, SSRIs: Selective serotonin reuptake inhibitors.

**Table 8.** The RECORD statement for pharmacoepidemiology (RECORD-PE) checklist of items, extended from the STROBE and RECORD statements, which should be reported in non-interventional pharmacoepidemiological studies using routinely collected health data.

| Item No                   | STROBE items                                                                                                                                                                                                                                                                                                                                                                                                                                                                                                                                                                                                                                         | RECORD items                                                                                                                                                                                                                                                                                                                                                                                                                                                                                                                                                                                                                                                         | RECORD-PE items                                                                                                                                                                                                                                                                                                                                                                 | Page No                     |
|---------------------------|------------------------------------------------------------------------------------------------------------------------------------------------------------------------------------------------------------------------------------------------------------------------------------------------------------------------------------------------------------------------------------------------------------------------------------------------------------------------------------------------------------------------------------------------------------------------------------------------------------------------------------------------------|----------------------------------------------------------------------------------------------------------------------------------------------------------------------------------------------------------------------------------------------------------------------------------------------------------------------------------------------------------------------------------------------------------------------------------------------------------------------------------------------------------------------------------------------------------------------------------------------------------------------------------------------------------------------|---------------------------------------------------------------------------------------------------------------------------------------------------------------------------------------------------------------------------------------------------------------------------------------------------------------------------------------------------------------------------------|-----------------------------|
| <b>Title and abstract</b> |                                                                                                                                                                                                                                                                                                                                                                                                                                                                                                                                                                                                                                                      |                                                                                                                                                                                                                                                                                                                                                                                                                                                                                                                                                                                                                                                                      |                                                                                                                                                                                                                                                                                                                                                                                 |                             |
| 1                         | (a) Indicate the study’s design with a commonly used term in the title or the abstract.<br>(b) Provide in the abstract an informative and balanced summary of what was done and what was found.                                                                                                                                                                                                                                                                                                                                                                                                                                                      | 1.1: The type of data used should be specified in the title or abstract.<br>When possible, the name of the databases used should be included.<br>1.2: If applicable, the geographical region and timeframe within which the study took place should be reported in the title or abstract.<br>1.3: If linkage between databases was conducted for the study, this should be clearly stated in the title or abstract.                                                                                                                                                                                                                                                  | —                                                                                                                                                                                                                                                                                                                                                                               | 1                           |
| <b>Introduction</b>       |                                                                                                                                                                                                                                                                                                                                                                                                                                                                                                                                                                                                                                                      |                                                                                                                                                                                                                                                                                                                                                                                                                                                                                                                                                                                                                                                                      |                                                                                                                                                                                                                                                                                                                                                                                 |                             |
| Background rationale      |                                                                                                                                                                                                                                                                                                                                                                                                                                                                                                                                                                                                                                                      |                                                                                                                                                                                                                                                                                                                                                                                                                                                                                                                                                                                                                                                                      |                                                                                                                                                                                                                                                                                                                                                                                 |                             |
| 2                         | Explain the scientific background and rationale for the investigation being reported.                                                                                                                                                                                                                                                                                                                                                                                                                                                                                                                                                                | —                                                                                                                                                                                                                                                                                                                                                                                                                                                                                                                                                                                                                                                                    | —                                                                                                                                                                                                                                                                                                                                                                               | 1                           |
| Objectives                |                                                                                                                                                                                                                                                                                                                                                                                                                                                                                                                                                                                                                                                      |                                                                                                                                                                                                                                                                                                                                                                                                                                                                                                                                                                                                                                                                      |                                                                                                                                                                                                                                                                                                                                                                                 |                             |
| 3                         | State specific objectives, including any prespecified hypotheses.                                                                                                                                                                                                                                                                                                                                                                                                                                                                                                                                                                                    | —                                                                                                                                                                                                                                                                                                                                                                                                                                                                                                                                                                                                                                                                    | —                                                                                                                                                                                                                                                                                                                                                                               | 2                           |
| <b>Methods</b>            |                                                                                                                                                                                                                                                                                                                                                                                                                                                                                                                                                                                                                                                      |                                                                                                                                                                                                                                                                                                                                                                                                                                                                                                                                                                                                                                                                      |                                                                                                                                                                                                                                                                                                                                                                                 |                             |
| Study design              |                                                                                                                                                                                                                                                                                                                                                                                                                                                                                                                                                                                                                                                      |                                                                                                                                                                                                                                                                                                                                                                                                                                                                                                                                                                                                                                                                      |                                                                                                                                                                                                                                                                                                                                                                                 |                             |
| 4                         | Present key elements of study design early in the paper.                                                                                                                                                                                                                                                                                                                                                                                                                                                                                                                                                                                             | —                                                                                                                                                                                                                                                                                                                                                                                                                                                                                                                                                                                                                                                                    | 4.a: Include details of the specific study design (and its features) and report the use of multiple designs if used.<br>4.b: The use of a diagram(s) is recommended to illustrate key aspects of the study design(s), including exposure, washout, lag and observation periods, and covariate definitions as relevant.                                                          | 2                           |
| Setting                   |                                                                                                                                                                                                                                                                                                                                                                                                                                                                                                                                                                                                                                                      |                                                                                                                                                                                                                                                                                                                                                                                                                                                                                                                                                                                                                                                                      |                                                                                                                                                                                                                                                                                                                                                                                 |                             |
| 5                         | Describe the setting, locations, and relevant dates, including periods of recruitment, exposure, follow-up, and data collection.                                                                                                                                                                                                                                                                                                                                                                                                                                                                                                                     | —                                                                                                                                                                                                                                                                                                                                                                                                                                                                                                                                                                                                                                                                    | —                                                                                                                                                                                                                                                                                                                                                                               | 2                           |
| Participants              |                                                                                                                                                                                                                                                                                                                                                                                                                                                                                                                                                                                                                                                      |                                                                                                                                                                                                                                                                                                                                                                                                                                                                                                                                                                                                                                                                      |                                                                                                                                                                                                                                                                                                                                                                                 |                             |
| 6                         | (a) Cohort study—give the eligibility criteria, and the sources and methods of selection of participants. Describe methods of follow-up. Case-control study—give the eligibility criteria, and the sources and methods of case ascertainment and control selection. Give the rationale for the choice of cases and controls. Cross sectional study—give the eligibility criteria, and the sources and methods of selection of participants.<br>(b) Cohort study—for matched studies, give matching criteria and number of exposed and unexposed. Case-control study—for matched studies, give matching criteria and the number of controls per case. | 6.1: The methods of study population selection (such as codes or algorithms used to identify participants) should be listed in detail. If this is not possible, an explanation should be provided.<br>6.2: Any validation studies of the codes or algorithms used to select the population should be referenced. If validation was conducted for this study and not published elsewhere, detailed methods and results should be provided.<br>6.3: If the study involved linkage of databases, consider use of a flow diagram or other graphical display to demonstrate the data linkage process, including the number of individuals with linked data at each stage. | 6.1.a: Describe the study entry criteria and the order in which these criteria were applied to identify the study population. Specify whether only users with a specific indication were included and whether patients were allowed to enter the study population once or if multiple entries were permitted. See explanatory document for guidance related to matched designs. | Not applicable <sup>e</sup> |
| Variables                 |                                                                                                                                                                                                                                                                                                                                                                                                                                                                                                                                                                                                                                                      |                                                                                                                                                                                                                                                                                                                                                                                                                                                                                                                                                                                                                                                                      |                                                                                                                                                                                                                                                                                                                                                                                 |                             |
| 7                         | Clearly define all outcomes, exposures, predictors, potential confounders, and effect modifiers. Give diagnostic criteria, if applicable.                                                                                                                                                                                                                                                                                                                                                                                                                                                                                                            | 7.1: A complete list of codes and algorithms used to classify exposures, outcomes, confounders, and effect modifiers should be provided. If these cannot be reported, an explanation should be provided.                                                                                                                                                                                                                                                                                                                                                                                                                                                             | 7.1.a: Describe how the drug exposure definition was developed.<br>7.1.b: Specify the data sources from which drug exposure information for individuals was obtained.                                                                                                                                                                                                           | Pages 2 - 3                 |

|                                         |                                                                                                                                                                                                                                                                                                                                                                                                                                                                                                                                            |   |   |                                                                                                                                                                                                                                                                                                                                                                                                                                                                                                                                                                                                                                                                                                  |                 |
|-----------------------------------------|--------------------------------------------------------------------------------------------------------------------------------------------------------------------------------------------------------------------------------------------------------------------------------------------------------------------------------------------------------------------------------------------------------------------------------------------------------------------------------------------------------------------------------------------|---|---|--------------------------------------------------------------------------------------------------------------------------------------------------------------------------------------------------------------------------------------------------------------------------------------------------------------------------------------------------------------------------------------------------------------------------------------------------------------------------------------------------------------------------------------------------------------------------------------------------------------------------------------------------------------------------------------------------|-----------------|
|                                         |                                                                                                                                                                                                                                                                                                                                                                                                                                                                                                                                            |   |   | 7.1.c: Describe the time window(s) during which an individual is considered exposed to the drug(s). The rationale for selecting a particular time window should be provided. The extent of potential left truncation or left censoring should be specified.<br>7.1.d: Justify how events are attributed to current, prior, ever, or cumulative drug exposure.<br>7.1.e: When examining drug dose and risk attribution, describe how current, historical or time on therapy are considered.<br>7.1.f: Use of any comparator groups should be outlined and justified.<br>7.1.g: Outline the approach used to handle individuals with more than one relevant drug exposure during the study period. |                 |
| <b>Data sources/measurement</b>         |                                                                                                                                                                                                                                                                                                                                                                                                                                                                                                                                            |   |   |                                                                                                                                                                                                                                                                                                                                                                                                                                                                                                                                                                                                                                                                                                  |                 |
| 8                                       | For each variable of interest, give sources of data and details of methods of assessment (measurement). Describe comparability of assessment methods if there is more than one group.                                                                                                                                                                                                                                                                                                                                                      | — |   | 8.a: Describe the healthcare system and mechanisms for generating the drug exposure records. Specify the care setting in which the drug(s) of interest was prescribed.                                                                                                                                                                                                                                                                                                                                                                                                                                                                                                                           | Pages 2-3       |
| <b>Bias</b>                             |                                                                                                                                                                                                                                                                                                                                                                                                                                                                                                                                            |   |   |                                                                                                                                                                                                                                                                                                                                                                                                                                                                                                                                                                                                                                                                                                  |                 |
| 9                                       | Describe any efforts to address potential sources of bias.                                                                                                                                                                                                                                                                                                                                                                                                                                                                                 | — | — |                                                                                                                                                                                                                                                                                                                                                                                                                                                                                                                                                                                                                                                                                                  | Not applicable  |
| <b>Study size</b>                       |                                                                                                                                                                                                                                                                                                                                                                                                                                                                                                                                            |   |   |                                                                                                                                                                                                                                                                                                                                                                                                                                                                                                                                                                                                                                                                                                  |                 |
| 10                                      | Explain how the study size was arrived at.                                                                                                                                                                                                                                                                                                                                                                                                                                                                                                 | — | — |                                                                                                                                                                                                                                                                                                                                                                                                                                                                                                                                                                                                                                                                                                  | Page 3          |
| <b>Quantitative variables</b>           |                                                                                                                                                                                                                                                                                                                                                                                                                                                                                                                                            |   |   |                                                                                                                                                                                                                                                                                                                                                                                                                                                                                                                                                                                                                                                                                                  |                 |
| 11                                      | Explain how quantitative variables were handled in the analyses. If applicable, describe which groupings were chosen, and why.                                                                                                                                                                                                                                                                                                                                                                                                             | — | — |                                                                                                                                                                                                                                                                                                                                                                                                                                                                                                                                                                                                                                                                                                  | Page 3          |
| <b>Statistical methods</b>              |                                                                                                                                                                                                                                                                                                                                                                                                                                                                                                                                            |   |   |                                                                                                                                                                                                                                                                                                                                                                                                                                                                                                                                                                                                                                                                                                  |                 |
| 12                                      | (a) Describe all statistical methods, including those used to control for confounding.<br>(b) Describe any methods used to examine subgroups and interactions.<br>(c) Explain how missing data were addressed.<br>(d) Cohort study—if applicable, explain how loss to follow-up was addressed. Case-control study—if applicable, explain how matching of cases and controls was addressed. Cross sectional study—if applicable, describe analytical methods taking account of sampling strategy.<br>(e) Describe any sensitivity analyses. | — |   | 12.1.a: Describe the methods used to evaluate whether the assumptions have been met.<br>12.1.b: Describe and justify the use of multiple designs, design features, or analytical approaches.                                                                                                                                                                                                                                                                                                                                                                                                                                                                                                     | Not applicable  |
| <b>Data access and cleaning methods</b> |                                                                                                                                                                                                                                                                                                                                                                                                                                                                                                                                            |   |   |                                                                                                                                                                                                                                                                                                                                                                                                                                                                                                                                                                                                                                                                                                  |                 |
| 12                                      |                                                                                                                                                                                                                                                                                                                                                                                                                                                                                                                                            | — |   | 12.1: Authors should describe the extent to which the investigators had access to the database population used to create the study population.<br>12.2: Authors should provide information on the data cleaning methods used in the study.                                                                                                                                                                                                                                                                                                                                                                                                                                                       | Table S1 and S2 |
| <b>Linkage</b>                          |                                                                                                                                                                                                                                                                                                                                                                                                                                                                                                                                            |   |   |                                                                                                                                                                                                                                                                                                                                                                                                                                                                                                                                                                                                                                                                                                  |                 |
| 12                                      |                                                                                                                                                                                                                                                                                                                                                                                                                                                                                                                                            | — |   | 12.3: State whether the study included person level, institutional level, or other data linkage across two or more databases. The methods of linkage and methods of linkage quality evaluation should be provided.                                                                                                                                                                                                                                                                                                                                                                                                                                                                               | Page 2          |
| <b>Results</b>                          |                                                                                                                                                                                                                                                                                                                                                                                                                                                                                                                                            |   |   |                                                                                                                                                                                                                                                                                                                                                                                                                                                                                                                                                                                                                                                                                                  |                 |
| <b>Participants</b>                     |                                                                                                                                                                                                                                                                                                                                                                                                                                                                                                                                            |   |   |                                                                                                                                                                                                                                                                                                                                                                                                                                                                                                                                                                                                                                                                                                  |                 |

|                   |                                                                                                                                                                                                                                                                                                                                                                                                                  |                                                                                                                                                                                                                                                                                                            |                                                                                                                                                                                                                                                                                           |                |
|-------------------|------------------------------------------------------------------------------------------------------------------------------------------------------------------------------------------------------------------------------------------------------------------------------------------------------------------------------------------------------------------------------------------------------------------|------------------------------------------------------------------------------------------------------------------------------------------------------------------------------------------------------------------------------------------------------------------------------------------------------------|-------------------------------------------------------------------------------------------------------------------------------------------------------------------------------------------------------------------------------------------------------------------------------------------|----------------|
| 13                | (a) Report the numbers of individuals at each stage of the study (eg, numbers potentially eligible, examined for eligibility, confirmed eligible, included in the study, completing follow-up, and analysed).<br>(b) Give reasons for non-participation at each stage.<br>(c) Consider use of a flow diagram.                                                                                                    | 13.1: Describe in detail the selection of the individuals included in the study (that is, study population selection) including filtering based on data quality, data availability, and linkage. The selection of included individuals can be described in the text or by means of the study flow diagram. | —                                                                                                                                                                                                                                                                                         | Page 3         |
| Descriptive data  |                                                                                                                                                                                                                                                                                                                                                                                                                  |                                                                                                                                                                                                                                                                                                            |                                                                                                                                                                                                                                                                                           |                |
| 14                | (a) Give characteristics of study participants (eg, demographic, clinical, social) and information on exposures and potential confounders.<br>(b) Indicate the number of participants with missing data for each variable of interest.<br>(c) Cohort study—summarise follow-up time (eg, average and total amount).                                                                                              | —                                                                                                                                                                                                                                                                                                          | —                                                                                                                                                                                                                                                                                         | Pages 3 - 4    |
| Outcome data      |                                                                                                                                                                                                                                                                                                                                                                                                                  |                                                                                                                                                                                                                                                                                                            |                                                                                                                                                                                                                                                                                           |                |
| 15                | Cohort study—report numbers of outcome events or summary measures over time.<br>Case-control study—report numbers in each exposure category, or summary measures of exposure. Cross sectional study—report numbers of outcome events or summary measures.                                                                                                                                                        | —                                                                                                                                                                                                                                                                                                          | —                                                                                                                                                                                                                                                                                         | Pages 4 - 6    |
| Main results      |                                                                                                                                                                                                                                                                                                                                                                                                                  |                                                                                                                                                                                                                                                                                                            |                                                                                                                                                                                                                                                                                           |                |
| 16                | (a) Give unadjusted estimates and, if applicable, confounder adjusted estimates and their precision (eg, 95% confidence intervals). Make clear which confounders were adjusted for and why they were included.<br>(b) Report category boundaries when continuous variables are categorised.<br>(c) If relevant, consider translating estimates of relative risk into absolute risk for a meaningful time period. | —                                                                                                                                                                                                                                                                                                          | —                                                                                                                                                                                                                                                                                         | Not applicable |
| Other analyses    |                                                                                                                                                                                                                                                                                                                                                                                                                  |                                                                                                                                                                                                                                                                                                            |                                                                                                                                                                                                                                                                                           |                |
| 17                | Report other analyses done—eg, analyses of subgroups and interactions, and sensitivity analyses.                                                                                                                                                                                                                                                                                                                 | —                                                                                                                                                                                                                                                                                                          | —                                                                                                                                                                                                                                                                                         | Not applicable |
| <b>Discussion</b> |                                                                                                                                                                                                                                                                                                                                                                                                                  |                                                                                                                                                                                                                                                                                                            |                                                                                                                                                                                                                                                                                           |                |
| Key results       |                                                                                                                                                                                                                                                                                                                                                                                                                  |                                                                                                                                                                                                                                                                                                            |                                                                                                                                                                                                                                                                                           |                |
| 18                | Summarise key results with reference to study objectives.                                                                                                                                                                                                                                                                                                                                                        | —                                                                                                                                                                                                                                                                                                          | —                                                                                                                                                                                                                                                                                         | Page 6         |
| Limitations       |                                                                                                                                                                                                                                                                                                                                                                                                                  |                                                                                                                                                                                                                                                                                                            |                                                                                                                                                                                                                                                                                           |                |
| 19                | Discuss limitations of the study, taking into account sources of potential bias or imprecision. Discuss both direction and magnitude of any potential bias.                                                                                                                                                                                                                                                      | 19.1: Discuss the implications of using data that were not created or collected to answer the specific research question(s). Include discussion of misclassification bias, unmeasured confounding, missing data, and changing eligibility over time, as they pertain to the study being reported.          | 19.1.a: Describe the degree to which the chosen database(s) adequately captures the drug exposure(s) of interest.                                                                                                                                                                         | Page 7         |
| Interpretation    |                                                                                                                                                                                                                                                                                                                                                                                                                  |                                                                                                                                                                                                                                                                                                            |                                                                                                                                                                                                                                                                                           |                |
| 20                | Give a cautious overall interpretation of results considering objectives, limitations, multiplicity of analyses, results from similar studies, and other relevant evidence.                                                                                                                                                                                                                                      | —                                                                                                                                                                                                                                                                                                          | 20.a: Discuss the potential for confounding by indication, contraindication or disease severity or selection bias (healthy adherer/sick stopper) as alternative explanations for the study findings when relevant. [A: Original text indicated this item was RECORD (ie, not RECORD-PE)?] | Pages 6 - 8    |
| Generalisability  |                                                                                                                                                                                                                                                                                                                                                                                                                  |                                                                                                                                                                                                                                                                                                            |                                                                                                                                                                                                                                                                                           |                |
| 21                | Discuss the generalisability (external validity) of the study results.                                                                                                                                                                                                                                                                                                                                           | —                                                                                                                                                                                                                                                                                                          | —                                                                                                                                                                                                                                                                                         | Page 6 - 8     |

| Other information                                         |                                                                                                                                                                |   |                |
|-----------------------------------------------------------|----------------------------------------------------------------------------------------------------------------------------------------------------------------|---|----------------|
| Funding                                                   |                                                                                                                                                                |   |                |
| 22                                                        | Give the source of funding and the role of the funders for the present study and, if applicable, for the original study on which the present article is based. | — | Page 8         |
| Accessibility of protocol, raw data, and programming code |                                                                                                                                                                |   |                |
| 22                                                        | 22.1: Authors should provide information on how to access any supplemental information such as the study protocol, raw data, or programming code.              | — | Not applicable |

RECORD=reporting of studies conducted using observational routinely collected data; RECORD-PE=RECORD for pharmacoepidemiological research; STROBE=strengthening the reporting of observational studies in epidemiology.

**\*REFERENCE: Langan SM, Schmidt S, Wing K, Ehrenstein V, Nicholls S, Filion K, Klungel O, Petersen I, Sorensen H, Guttman A, Harron K, Hemkens L, Moher D, Schneeweiss S, Smeeth L, Sturkenboom M, von Elm E, Wang S, Benchimol EI. The REporting of studies Conducted using Observational Routinely-collected health Data (RECORD) Statement for Pharmacoepidemiology (RECORD-PE). *BMJ* 2018; 363: k3532.**
